## Addendum: Role of microRNAs in glioblastoma

Ming Chen<sup>1,2</sup>, Zdravka Medarova<sup>3</sup> and Anna Moore<sup>1,2</sup>

<sup>1</sup>Precision Health Program, Michigan State University, East Lansing, MI 48824, USA

<sup>2</sup>Department of Radiology, College of Human Medicine, Michigan State University, East Lansing, MI 48824, USA

<sup>3</sup>Athinoula A. Martinos Center for Biomedical Imaging, Department of Radiology, Massachusetts General Hospital and Harvard Medical School, Charlestown, MA 02129, USA

**Published:**

**Copyright:** © 2023 Chen et al. This is an open access article distributed under the terms of the [Creative Commons Attribution License](#) (CC BY 4.0), which permits unrestricted use, distribution, and reproduction in any medium, provided the original author and source are credited.

**This article has an addendum:** No funding was used for this publication.

Original article: Oncotarget. 2021; 12:1707–1723. <https://doi.org/10.18632/oncotarget.28039>
